# Supplementary material for: 3-Hydroxyanthranilic Acid Delays Paralysis in <em>Caenorhabditis elegans</em> Models of Amyloid-Beta and Polyglutamine Proteotoxicity
Source: Preprints.org preprint supplement (doi:10.20944/preprints202405.0079.v1), 2024-05-01
Supplement: Supplementary file 3 [file supplementary]

## Sheet: Table S1
Table S1. Summary statistics for paralysis experiments in C. elegans Alzheimer's (Aβ) and Huntington's (Q35) disease models. EV = empty vector; SD = standard deviation; SE = standard error.
					Intervention						Control						Change in Age at Paralysis (Target vs. EV RNAi)
Intervention	Strain Background	Temperature	Experiment ID		Median	Mean	SD	SE	N		Median	Mean	SD	SE	N		% Median	% Mean	P	P (Bonferroni)
tdo-2(RNAi)	Q35	15°C	pooled		25	24.0097	4.81542	0.334695	207		21	21.344	5.87929	0.350107	282		19.0476	12.4892	0.000173831	0.000347661
kynu-1(RNAi)	Q35	15°C	pooled		22	23.3441	5.4384	0.308383	311		21	21.344	5.87929	0.350107	282		4.7619	9.3707	0.00152078	0.00152078
haao-1(RNAi)	Q35	15°C	pooled		24	24.7595	6.64843	0.374004	316		21	21.344	5.87929	0.350107	282		14.2857	16.0023	1.14826e-09	3.44477e-09
tdo-2(RNAi)	Aß	15°C	pooled		25	25.689	5.55619	0.29957	344		21	20.6574	5.0476	0.280422	324		19.0476	24.3571	1.49239e-31	4.47716e-31
kynu-1(RNAi)	Aß	15°C	pooled		22	22.0751	5.39911	0.290258	346		21	20.6574	5.0476	0.280422	324		4.7619	6.86309	0.000179267	0.000179267
haao-1(RNAi)	Aß	15°C	pooled		25	23.9926	5.4914	0.27287	405		21	20.6574	5.0476	0.280422	324		19.0476	16.1452	5.49887e-18	1.09977e-17
tdo-2(RNAi)	Aß	25°C	pooled		12	11.6847	2.36966	0.129857	333		11	10.9242	1.45889	0.0787727	343		9.09091	6.96149	2.849e-15	8.54701e-15
kynu-1(RNAi)	Aß	25°C	pooled		11	11.305	1.48134	0.0802192	341		11	10.9242	1.45889	0.0787727	343		0	3.48572	0.000177026	0.000177026
haao-1(RNAi)	Aß	25°C	pooled		12	11.1983	1.92255	0.100908	363		11	10.9242	1.45889	0.0787727	343		9.09091	2.50956	2.81636e-05	5.63272e-05
tdo-2(RNAi)	Q35	25°C	pooled		11	10.7394	1.53306	0.119348	165		11	10.4813	1.45561	0.0995037	214		0	2.46234	0.118919	0.237838
kynu-1(RNAi)	Q35	25°C	pooled		11	10.7459	1.40089	0.102995	185		11	10.4813	1.45561	0.0995037	214		0	2.52485	0.130375	0.237838
haao-1(RNAi)	Q35	25°C	pooled		11	11.0053	1.66151	0.121178	188		11	10.4813	1.45561	0.0995037	214		0	4.99948	0.000921838	0.00276551
tdo-2(RNAi)	Q35	15°C	1		22	22.3548	3.78919	0.481228	62		16	18.271	4.51078	0.436073	107		37.5	22.3513	7.09887e-06	1.41977e-05
kynu-1(RNAi)	Q35	15°C	1		21	20.3964	3.65464	0.346883	111		16	18.271	4.51078	0.436073	107		31.25	11.6325	0.00183437	0.00183437
haao-1(RNAi)	Q35	15°C	1		21	22.513	5.29867	0.494104	115		16	18.271	4.51078	0.436073	107		31.25	23.2172	4.23888e-09	1.27166e-08
tdo-2(RNAi)	Aß	15°C	1		28	26.2314	6.24534	0.567758	121		18	18.4959	5.32594	0.484177	121		55.5556	41.8231	2.12092e-24	6.36276e-24
kynu-1(RNAi)	Aß	15°C	1		21	19	5.40609	0.485481	124		18	18.4959	5.32594	0.484177	121		16.6667	2.72565	0.434604	0.434604
haao-1(RNAi)	Aß	15°C	1		25	23.0621	5.32974	0.420042	161		18	18.4959	5.32594	0.484177	121		38.8889	24.6879	1.66757e-12	3.33513e-12
tdo-2(RNAi)	Aß	25°C	2		12	11.5042	2.5367	0.232539	119		11	11.0331	1.3723	0.124754	121		9.09091	4.27029	2.2394e-05	6.71819e-05
kynu-1(RNAi)	Aß	25°C	2		12	11.4397	1.35372	0.12569	116		11	11.0331	1.3723	0.124754	121		9.09091	3.68526	0.0167926	0.0335853
haao-1(RNAi)	Aß	25°C	2		12	11.1371	2.08038	0.186824	124		11	11.0331	1.3723	0.124754	121		9.09091	0.942975	0.0292546	0.0335853
tdo-2(RNAi)	Q35	25°C	3		10.5	10.5222	1.37621	0.145065	90		10	10.1633	1.29121	0.130432	98		5	3.53191	0.0832369	0.166474
kynu-1(RNAi)	Q35	25°C	3		10	10.2188	1.30067	0.132749	96		10	10.1633	1.29121	0.130432	98		0	0.545934	0.641397	0.641397
haao-1(RNAi)	Q35	25°C	3		11	10.7835	1.57445	0.159862	97		10	10.1633	1.29121	0.130432	98		10	6.10276	0.00149249	0.00447748
tdo-2(RNAi)	Aß	25°C	3		12	11.7563	2.07412	0.190134	119		11	11.0909	1.23983	0.112712	121		9.09091	5.99945	2.2394e-05	6.71819e-05
kynu-1(RNAi)	Aß	25°C	3		12	11.5	1.19265	0.110735	116		11	11.0909	1.23983	0.112712	121		9.09091	3.68852	0.0167926	0.0335853
haao-1(RNAi)	Aß	25°C	3		12	11.3468	1.67064	0.150028	124		11	11.0909	1.23983	0.112712	121		9.09091	2.30698	0.0292546	0.0335853
tdo-2(RNAi)	Q35	15°C	4		22	22.5217	3.7285	0.777446	23		19	20	4.27112	0.743506	33		15.7895	12.6087	0.0495435	0.099087
kynu-1(RNAi)	Q35	15°C	4		21	22.4062	3.87991	0.484989	64		19	20	4.27112	0.743506	33		10.5263	12.0312	0.0144265	0.0432795
haao-1(RNAi)	Q35	15°C	4		21	21.98	3.53548	0.499992	50		19	20	4.27112	0.743506	33		10.5263	9.9	0.0867031	0.099087
tdo-2(RNAi)	Aß	15°C	4		25	25.98	4.34046	0.434046	100		22	22.5977	4.10063	0.439634	87		13.6364	14.9674	1.31748e-06	3.95244e-06
kynu-1(RNAi)	Aß	15°C	4		22	23.1942	3.71054	0.365611	103		22	22.5977	4.10063	0.439634	87		0	2.63953	0.365443	0.365443
haao-1(RNAi)	Aß	15°C	4		25	24.4128	3.92875	0.376306	109		22	22.5977	4.10063	0.439634	87		13.6364	8.03242	0.00274661	0.00549323
tdo-2(RNAi)	Q35	25°C	5		11	11	1.66533	0.192296	75		11	10.75	1.53058	0.142111	116		0	2.32558	0.264185	0.264185
kynu-1(RNAi)	Q35	25°C	5		11	11.3146	1.27725	0.135388	89		11	10.75	1.53058	0.142111	116		0	5.25216	0.0505343	0.101069
haao-1(RNAi)	Q35	25°C	5		11	11.2418	1.7183	0.180126	91		11	10.75	1.53058	0.142111	116		0	4.5745	0.0261166	0.0783497
tdo-2(RNAi)	Aß	25°C	5		12	11.8211	2.48354	0.254806	95		11	10.5941	1.72448	0.171592	101		9.09091	11.5819	1.56567e-07	4.697e-07
kynu-1(RNAi)	Aß	25°C	5		11	10.9541	1.7939	0.171825	109		11	10.5941	1.72448	0.171592	101		0	3.39878	0.0835312	0.0835312
haao-1(RNAi)	Aß	25°C	5		12	11.1043	1.98855	0.185433	115		11	10.5941	1.72448	0.171592	101		9.09091	4.81674	0.00229592	0.00459183
tdo-2(RNAi)	Q35	15°C	6		25	25.1311	5.13418	0.464827	122		25	23.9718	5.88498	0.493857	142		0	4.83616	0.232112	0.232112
kynu-1(RNAi)	Q35	15°C	6		25	26.1912	5.83412	0.500272	136		25	23.9718	5.88498	0.493857	142		0	9.25814	0.00668524	0.0133705
haao-1(RNAi)	Q35	15°C	6		27	27.3907	7.32498	0.596098	151		25	23.9718	5.88498	0.493857	142		8	14.2621	4.33183e-06	1.29955e-05
tdo-2(RNAi)	Aß	15°C	6		23	24.9187	5.63034	0.50767	123		22	21.4569	4.54175	0.42169	116		4.54545	16.1338	4.58108e-07	9.16217e-07
kynu-1(RNAi)	Aß	15°C	6		23	24.3109	5.14291	0.47145	119		22	21.4569	4.54175	0.42169	116		4.54545	13.3012	1.86539e-05	1.86539e-05
haao-1(RNAi)	Aß	15°C	6		25	24.763	6.50835	0.56015	135		22	21.4569	4.54175	0.42169	116		13.6364	15.4079	9.79871e-08	2.93961e-07
1mM 3HAA	Aß	20°C	pooled		20	19.1564	3.85759	0.232621	275		16	16.3869	3.90068	0.235649	274		25	16.9007	8.54525e-15	2.56358e-14
haao-1(RNAi)	Aß	20°C	pooled		19	19.0171	3.62871	0.212354	292		16	16.3869	3.90068	0.235649	274		18.75	16.051	2.63155e-13	5.2631e-13
1mM 3HAA	Q35	20°C	pooled		22	21.1931	4.7867	0.297431	259		20	19.2391	4.67037	0.281123	276		10	10.156	1.81784e-06	5.45353e-06
haao-1(RNAi)	Q35	20°C	pooled		21	20.7724	4.4206	0.281847	246		20	19.2391	4.67037	0.281123	276		5	7.96932	0.00132391	0.00264782
1mM 3HAA	Aß	20°C	7		18	18.5882	3.96245	0.429788	85		16	16.4533	4.07363	0.470383	75		12.5	12.9755	0.00198294	0.00594883
haao-1(RNAi)	Aß	20°C	7		18	18.6	3.88101	0.409094	90		16	16.4533	4.07363	0.470383	75		12.5	13.047	0.00259736	0.00594883
1mM 3HAA	Q35	20°C	7		21	20.6939	4.5634	0.460973	98		18	17.6923	4.07537	0.427215	91		16.6667	16.9654	1.61886e-06	4.85659e-06
haao-1(RNAi)	Q35	20°C	7		20	20.2766	4.15243	0.42829	94		18	17.6923	4.07537	0.427215	91		11.1111	14.6068	7.00414e-05	0.000140083
1mM 3HAA	Aß	20°C	8		19	19.2737	3.87826	0.397901	95		17	16.5098	4.12963	0.408894	102		11.7647	16.7408	1.12419e-05	3.37258e-05
haao-1(RNAi)	Aß	20°C	8		19	18.7576	3.66554	0.368401	99		17	16.5098	4.12963	0.408894	102		11.7647	13.6148	0.000482902	0.000965805
1mM 3HAA	Q35	20°C	8		23	21.475	4.76701	0.532968	80		19	18.9798	4.47209	0.449462	99		21.0526	13.1466	0.000237858	0.000713574
haao-1(RNAi)	Q35	20°C	8		21	20.8043	4.24325	0.44239	92		19	18.9798	4.47209	0.449462	99		10.5263	9.61312	0.0105509	0.0211018
1mM 3HAA	Aß	20°C	9		20	19.5474	3.67858	0.377415	95		16	16.2062	3.48765	0.354117	97		25	20.6167	8.20277e-10	1.64055e-09
haao-1(RNAi)	Aß	20°C	9		20	19.6311	3.26497	0.321707	103		16	16.2062	3.48765	0.354117	97		25	21.1332	2.18001e-10	6.54004e-10
1mM 3HAA	Q35	20°C	9		22	21.5185	5.01384	0.557093	81		22	21.1744	4.80114	0.517721	86		0	1.62507	0.393647	1
haao-1(RNAi)	Q35	20°C	9		22	21.5	4.95816	0.640095	60		22	21.1744	4.80114	0.517721	86		0	1.53762	0.550075	1

## Sheet: S2
Table S1. Summary statistics for Q35::YFP aggregate quantification experiments in C. elegans. EV = empty vector; SD = standard deviation; SE = standard error.
RNAi Target					Target RNAi						EV RNAi						Change in Age at Paralysis (Target vs. EV RNAi)
Worm Gene	Trait	Temperature	Age		Median	Mean	SD	SE	N		Median	Mean	SD	SE	N		% Median	% Mean	P
kynu-1	aggregate number	15°C	7		16.5	17.8	4.91709	1.55492	10		15	14.9091	7.18964	2.16776	11		10	19.3902	0.293044
haao-1	aggregate number	15°C	7		22.5	19.8	7.58361	2.39815	10		15	14.9091	7.18964	2.16776	11		50	32.8049	0.147131
tdo-2	aggregate number	15°C	7		8.5	12.9	12.0964	3.82521	10		15	14.9091	7.18964	2.16776	11		-43.3333	-13.4756	0.654537
kynu-1	aggregate number	15°C	12		49	51.2	20.0433	6.33824	10		55.5	54.6	9.19178	2.9067	10		-11.7117	-6.22711	0.634192
haao-1	aggregate number	15°C	12		59.5	63.6	14.7588	4.66714	10		55.5	54.6	9.19178	2.9067	10		7.20721	16.4835	0.122366
tdo-2	aggregate number	15°C	12		57	53.3	11.9075	3.76549	10		55.5	54.6	9.19178	2.9067	10		2.7027	-2.38095	0.78794
kynu-1	aggregate number	15°C	17		89.5	87.3	9.93367	3.1413	10		84.5	83.2	19.0543	6.0255	10		5.91716	4.92788	0.556225
haao-1	aggregate number	15°C	17		86.5	90.25	10.2504	3.62408	8		84.5	83.2	19.0543	6.0255	10		2.36686	8.47356	0.332714
tdo-2	aggregate number	15°C	17		85.5	82.8	21.2488	6.71946	10		84.5	83.2	19.0543	6.0255	10		1.18343	-0.480769	0.965143
kynu-1	total aggregate volume	15°C	7		480622	474369	192205	60780.4	10		412973	381528	143164	43165.6	11		16.3809	24.3338	0.230319
haao-1	total aggregate volume	15°C	7		326572	358586	158514	50126.5	10		412973	381528	143164	43165.6	11		-20.9216	-6.01333	0.73269
tdo-2	total aggregate volume	15°C	7		204595	231359	150224	47505.1	10		412973	381528	143164	43165.6	11		-50.4581	-39.3599	0.0306387
kynu-1	total aggregate volume	15°C	12		976718	964345	463476	146564	10		1.26756e+06	1.36255e+06	313101	99011.3	10		-22.9449	-29.2249	0.0389647
haao-1	total aggregate volume	15°C	12		1.32252e+06	1.39082e+06	346043	109428	10		1.26756e+06	1.36255e+06	313101	99011.3	10		4.3361	2.07458	0.850263
tdo-2	total aggregate volume	15°C	12		1.127e+06	957977	342462	108296	10		1.26756e+06	1.36255e+06	313101	99011.3	10		-11.0891	-29.6923	0.0130391
kynu-1	total aggregate volume	15°C	17		1.40027e+06	1.3964e+06	218295	69031	10		1.10773e+06	1.07736e+06	316718	100155	10		26.4084	29.6124	0.0184824
haao-1	total aggregate volume	15°C	17		1.23824e+06	1.30561e+06	165886	58649.4	8		1.10773e+06	1.07736e+06	316718	100155	10		11.7814	21.1858	0.0692346
tdo-2	total aggregate volume	15°C	17		843733	803530	239637	75779.9	10		1.10773e+06	1.07736e+06	316718	100155	10		-23.8323	-25.417	0.0437896
kynu-1	aggregate number	25°C	7		72.5	70.6	15.4647	4.89035	10		76.5	76.8	14.172	4.48157	10		-5.22876	-8.07292	0.362414
haao-1	aggregate number	25°C	7		68	65.5556	19.4108	6.47025	9		76.5	76.8	14.172	4.48157	10		-11.1111	-14.6412	0.174235
tdo-2	aggregate number	25°C	7		40.5	39.5833	8.72258	2.51799	12		76.5	76.8	14.172	4.48157	10		-47.0588	-48.4592	3.64051e-06
kynu-1	aggregate number	25°C	11		78	74.7	16.1662	5.11219	10		87	83.6	16.3992	5.18588	10		-10.3448	-10.6459	0.237403
haao-1	aggregate number	25°C	11		81.5	78.3	17.8764	5.65302	10		87	83.6	16.3992	5.18588	10		-6.32184	-6.33971	0.498519
tdo-2	aggregate number	25°C	11		45	48	14.087	4.45471	10		87	83.6	16.3992	5.18588	10		-48.2759	-42.5837	6.37707e-05
kynu-1	total aggregate volume	25°C	7		1.15432e+06	1.09365e+06	302408	95629.7	10		1.32158e+06	1.10608e+06	341731	108065	10		-12.6561	-1.12363	0.93233
haao-1	total aggregate volume	25°C	7		1.00241e+06	863785	270787	90262.3	9		1.32158e+06	1.10608e+06	341731	108065	10		-24.1508	-21.9057	0.103691
tdo-2	total aggregate volume	25°C	7		496987	502279	163829	47293.3	12		1.32158e+06	1.10608e+06	341731	108065	10		-62.3946	-54.5892	0.000228549
kynu-1	total aggregate volume	25°C	11		939297	1.01828e+06	239201	75642	10		1.22408e+06	1.22141e+06	195596	61852.9	10		-23.2649	-16.6307	0.0527929
haao-1	total aggregate volume	25°C	11		1.09033e+06	1.04851e+06	165183	52235.5	10		1.22408e+06	1.22141e+06	195596	61852.9	10		-10.9263	-14.1559	0.0471038
tdo-2	total aggregate volume	25°C	11		550826	593626	226657	71675.1	10		1.22408e+06	1.22141e+06	195596	61852.9	10		-55.0007	-51.3984	3.53825e-06
